# Supplementary material for: Design of the Balance@Work project: systematic development, evaluation and implementation of an occupational health guideline aimed at the prevention of weight gain among employees
Source: Springer Nature journal article supplement (doi:10.1186/1471-2458-9-461), 2009-12-01
Supplement: 12889_2009_1864_MOESM4_ESM.pdf [file 12889_2009_1864_MOESM4_ESM.pdf]

|                                                                                                                                                                                  |                                                                                                                                                                                    |                                                                                                                                                                                                                                                           |                                                                             |                                                                                                                                                                                                                                                                      |                                                                                                                                                                                                                                                                                |
|----------------------------------------------------------------------------------------------------------------------------------------------------------------------------------|------------------------------------------------------------------------------------------------------------------------------------------------------------------------------------|-----------------------------------------------------------------------------------------------------------------------------------------------------------------------------------------------------------------------------------------------------------|-----------------------------------------------------------------------------|----------------------------------------------------------------------------------------------------------------------------------------------------------------------------------------------------------------------------------------------------------------------|--------------------------------------------------------------------------------------------------------------------------------------------------------------------------------------------------------------------------------------------------------------------------------|
| <b>A Prevention at the environmental level</b><br>advice for the employer                                                                                                        |                                                                                                                                                                                    |                                                                                                                                                                                                                                                           |                                                                             |                                                                                                                                                                                                                                                                      |                                                                                                                                                                                                                                                                                |
| 1 Inventory obesogenic risk factors in the work environment using the environment scan.                                                                                          |                                                                                                                                                                                    |                                                                                                                                                                                                                                                           |                                                                             |                                                                                                                                                                                                                                                                      |                                                                                                                                                                                                                                                                                |
| 2 Inventory if current health policy is adequate.                                                                                                                                |                                                                                                                                                                                    |                                                                                                                                                                                                                                                           |                                                                             |                                                                                                                                                                                                                                                                      |                                                                                                                                                                                                                                                                                |
| 3 Inform and advise the employer and workers' representative council.                                                                                                            |                                                                                                                                                                                    |                                                                                                                                                                                                                                                           |                                                                             |                                                                                                                                                                                                                                                                      |                                                                                                                                                                                                                                                                                |
| <b>B Prevention at the individual level</b><br>advice for the employee                                                                                                           |                                                                                                                                                                                    |                                                                                                                                                                                                                                                           |                                                                             |                                                                                                                                                                                                                                                                      |                                                                                                                                                                                                                                                                                |
| During all next steps: maintain good contact with the employee, emphasize confidentiality of results and address resistance to change.                                           |                                                                                                                                                                                    |                                                                                                                                                                                                                                                           |                                                                             |                                                                                                                                                                                                                                                                      |                                                                                                                                                                                                                                                                                |
| 1 Identify individuals at risk for weight gain.                                                                                                                                  |                                                                                                                                                                                    |                                                                                                                                                                                                                                                           |                                                                             |                                                                                                                                                                                                                                                                      |                                                                                                                                                                                                                                                                                |
| 2 Set the agenda: which performance objective or other subject would the employee like to address.                                                                               |                                                                                                                                                                                    |                                                                                                                                                                                                                                                           |                                                                             |                                                                                                                                                                                                                                                                      |                                                                                                                                                                                                                                                                                |
| 3 Inventory motivation for change and provide stage matched advice to change behavior:                                                                                           |                                                                                                                                                                                    |                                                                                                                                                                                                                                                           |                                                                             |                                                                                                                                                                                                                                                                      |                                                                                                                                                                                                                                                                                |
| <i>Unaware</i>                                                                                                                                                                   | <i>Unengaged</i>                                                                                                                                                                   | <i>Deciding about action</i>                                                                                                                                                                                                                              | <i>Deciding not to act</i>                                                  | <i>Deciding to act</i>                                                                                                                                                                                                                                               | <i>Acting</i>                                                                                                                                                                                                                                                                  |
| Target: knowledge, awareness and attitude.<br><br>Methods:<br>-tailored feedback<br>-self-monitoring<br>-personalized risk<br>-discuss decisional balance and beliefs            | Target: attitude, perceived behavioral control, motivation.<br><br>Methods:<br>-discuss decisional balance and beliefs<br>-reinforcement<br>-tailored feedback<br>-active learning | Target: attitude, perceived behavioral control to overcome barriers, intention, subjective norm<br><br>Methods:<br>-discuss decisional balance and beliefs<br>-reinforcement<br>-goal setting<br>-tailored feedback<br>-skill training<br>-social support | Target: attitude<br><br>Methods:<br>-discuss decisional balance and beliefs | Target: perceived behavioral control to overcome barriers, skills, subjective norm<br><br>Methods:<br>-positive feedback<br>-skill training<br>-set realistic goals<br>-active learning<br>-reinforcement<br>-form action plan<br>-skill training<br>-social support | Target: perceived behavioral control to overcome barriers, skills, habit, subjective norm<br><br>Methods:<br>-positive feedback<br>-active learning<br>-evaluate goals<br>-form action plan<br>-skill training<br>-social support<br>-rewarding<br>- relapse prevention skills |
| 4 Plan next counseling session                                                                                                                                                   |                                                                                                                                                                                    |                                                                                                                                                                                                                                                           |                                                                             |                                                                                                                                                                                                                                                                      |                                                                                                                                                                                                                                                                                |
| <b>C Evaluation and Maintenance</b>                                                                                                                                              |                                                                                                                                                                                    |                                                                                                                                                                                                                                                           |                                                                             |                                                                                                                                                                                                                                                                      |                                                                                                                                                                                                                                                                                |
| 1 Evaluate prevention at the environmental level after 6 months using the environment scan.                                                                                      |                                                                                                                                                                                    |                                                                                                                                                                                                                                                           |                                                                             |                                                                                                                                                                                                                                                                      |                                                                                                                                                                                                                                                                                |
| 2 Evaluate prevention at the individual level after 6 months using the employees action plan.                                                                                    |                                                                                                                                                                                    |                                                                                                                                                                                                                                                           |                                                                             |                                                                                                                                                                                                                                                                      |                                                                                                                                                                                                                                                                                |
| 3 Maintain prevention at the environmental level by setting prevention of weight gain on the company agenda once a year and address relapse prevention.                          |                                                                                                                                                                                    |                                                                                                                                                                                                                                                           |                                                                             |                                                                                                                                                                                                                                                                      |                                                                                                                                                                                                                                                                                |
| 4 Maintain prevention at the individual level by addressing the employees long term goals and provide permanent attention for weight gain prevention through active information. |                                                                                                                                                                                    |                                                                                                                                                                                                                                                           |                                                                             |                                                                                                                                                                                                                                                                      |                                                                                                                                                                                                                                                                                |
