# Supplementary figures and images for: Design of the Balance@Work project: systematic development, evaluation and implementation of an occupational health guideline aimed at the prevention of weight gain among employees
Source: Springer Nature journal article supplement (doi:10.1186/1471-2458-9-461), 2009-12-01

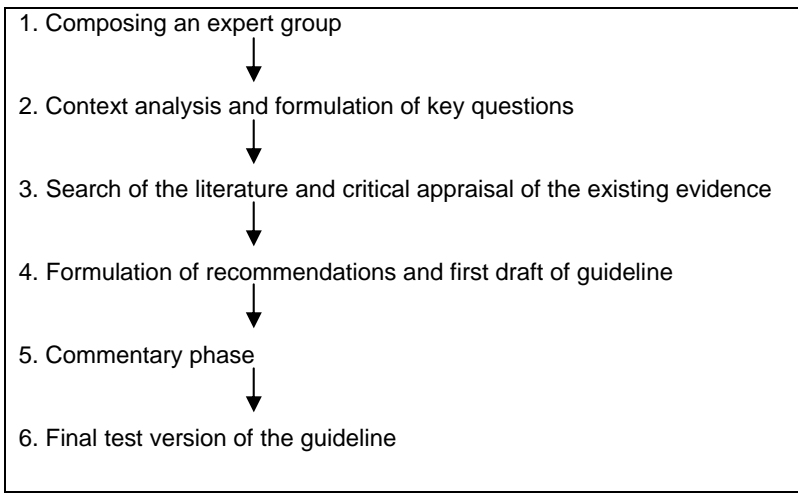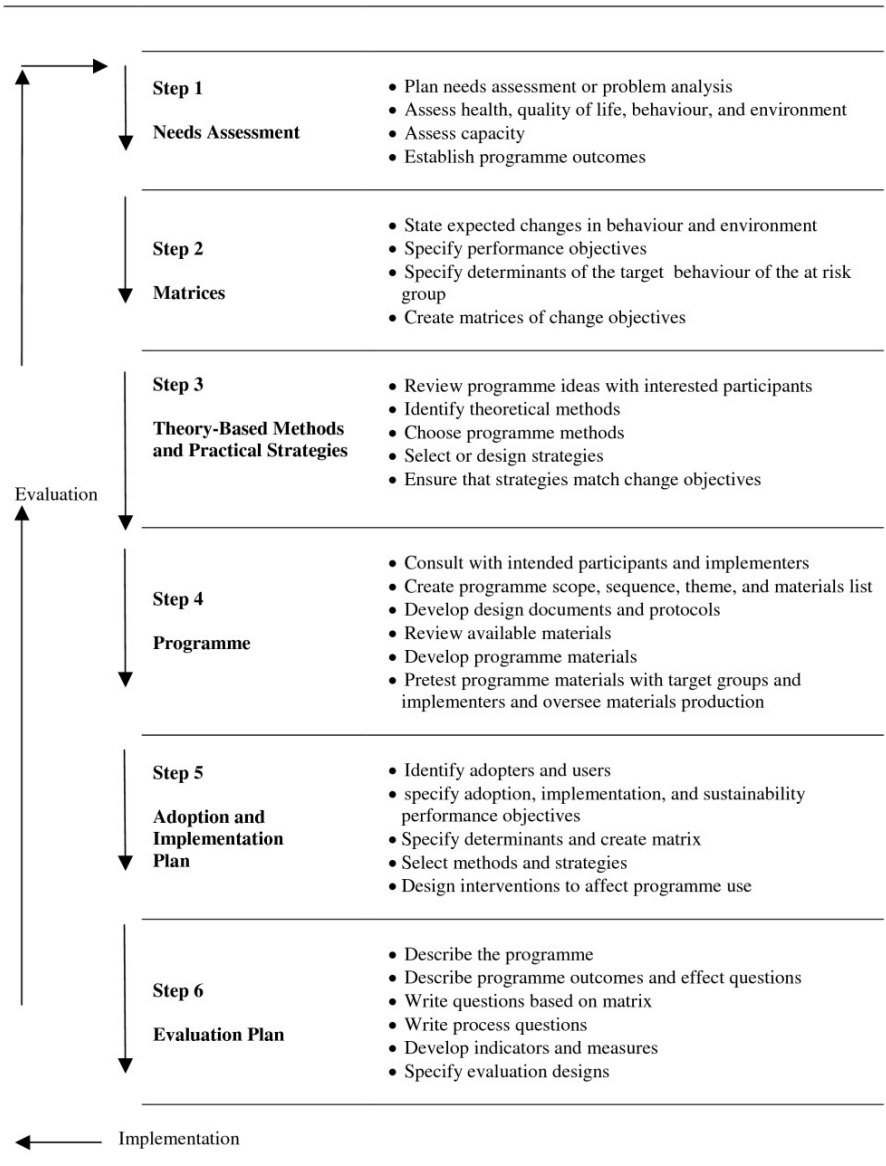

Supplement: 12889_2009_1864_MOESM2_ESM.pdf [file 12889_2009_1864_MOESM2_ESM.pdf]

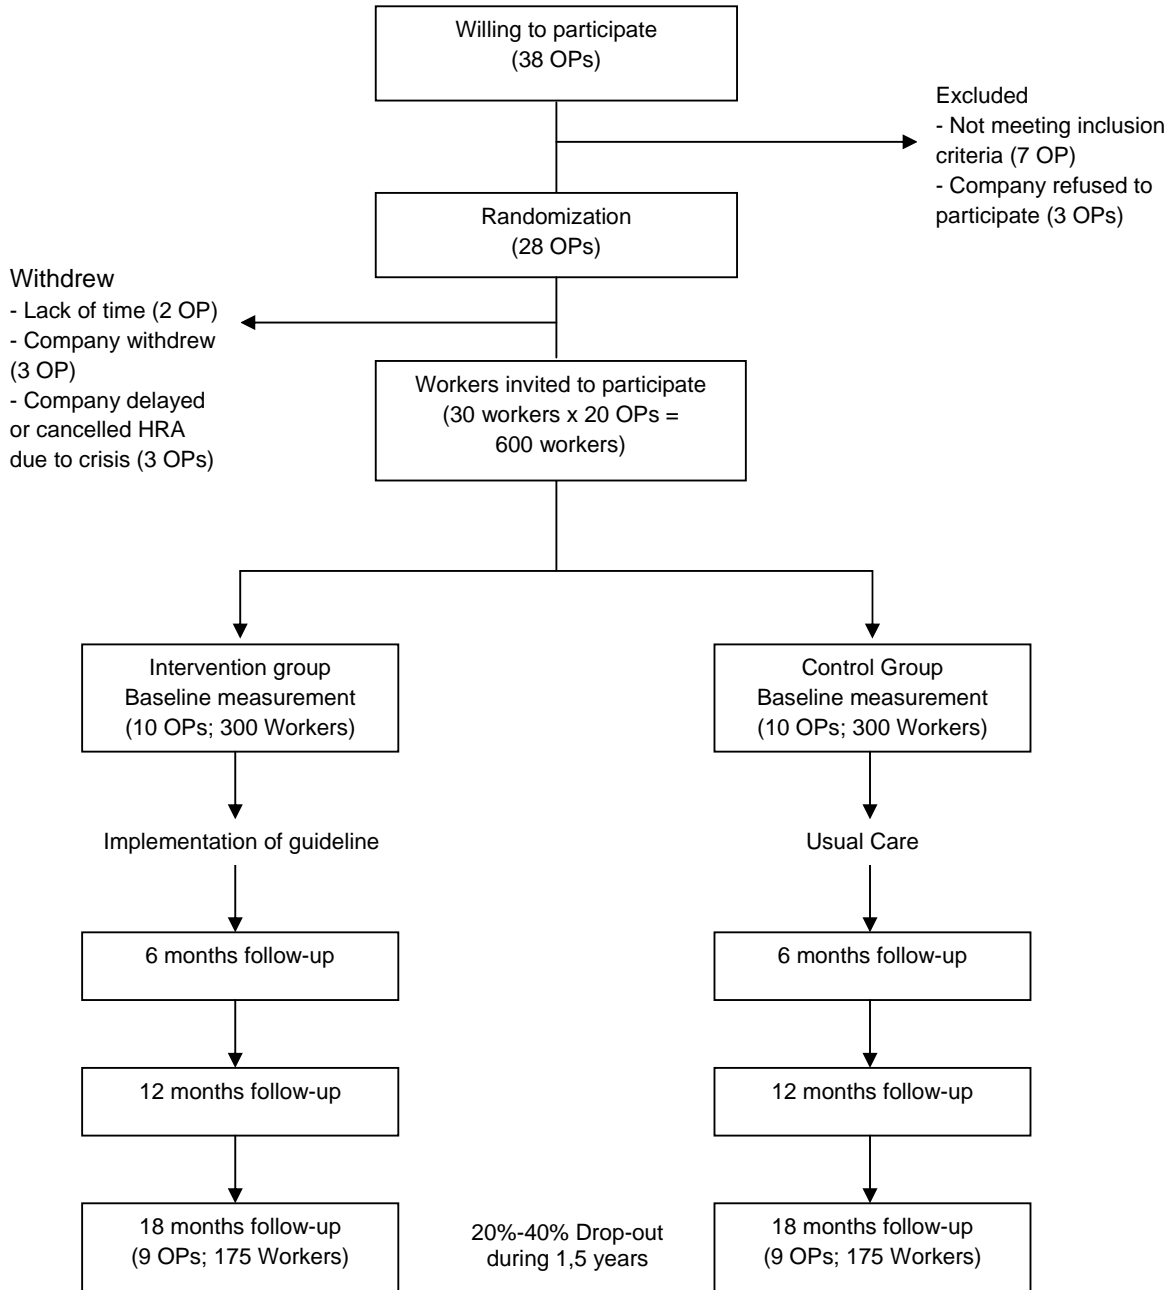

Supplement: 12889_2009_1864_MOESM5_ESM.pdf [file 12889_2009_1864_MOESM5_ESM.pdf]
